# Supplementary material
Source: MDPI journal article supplement (https://www.mdpi.com/2311-7524/9/10/1120)
Supplement: s1 [file s1]

**Exploring the Chemical Content of *Primula veris* L. subsp. *veris***  
**Wild-Growing Populations along a Climate Gradient:**  
**An HPLC-PDA-MS Quality Assessment of Flowers, Leaves and Roots for**  
**Sustainable Exploitation**

Ilias Stefanis <sup>1</sup>, Paschalina Chatzopoulou <sup>2</sup>, Nikos Krigas <sup>2,\*</sup>, Anastasia Karioti <sup>1,\*</sup>

**Supplementary materials**

- Figure S1.** Representative HPLC-PDA chromatogram of the *Primula veris* subsp. *veris* 2  
root extracts from the wild-growing population of Mt. Pangaio.
- Figure S2.** UV and MS spectra of the compound designated as gaultherin. 2
- Figure S3.** Representative HPLC-MS chromatogram (SIM mode) of the *Primula veris* 3  
subsp. *veris* root extracts from the wild-growing population of Mt. Pangaio.

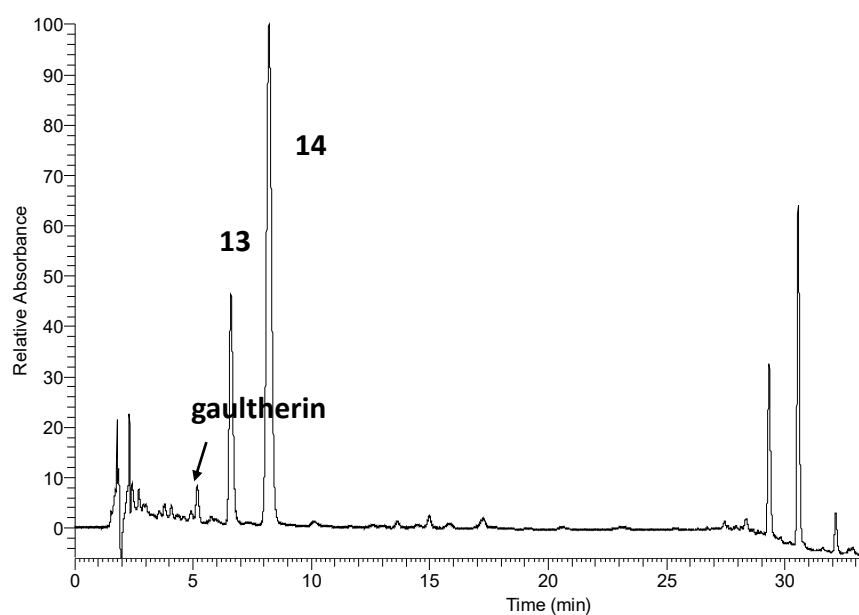

**Figure S1.** Representative HPLC-PDA chromatogram of the *Primula veris* subsp. *veris* root extracts from the wild-growing population of Mt. Pangaio. Column: Luna RP-C18 (3  $\mu$ m, 150 x 3 mm, Phenomenex). Gradient system: (A) H<sub>2</sub>O (with 0.05% formic acid, v/v) and (B) acetonitrile as follows: 0-5 min, to 80% A; 5-20 min, to 55% A; 20-25 min, to 50% A; 25-35 min, to 40% A; 35-40 min, to 83% A; 40-45 min, 83% A. **13**: primulaverin; **14**: primeverin. Constituents between 29-31 min are unknown compounds of phenolic nature.

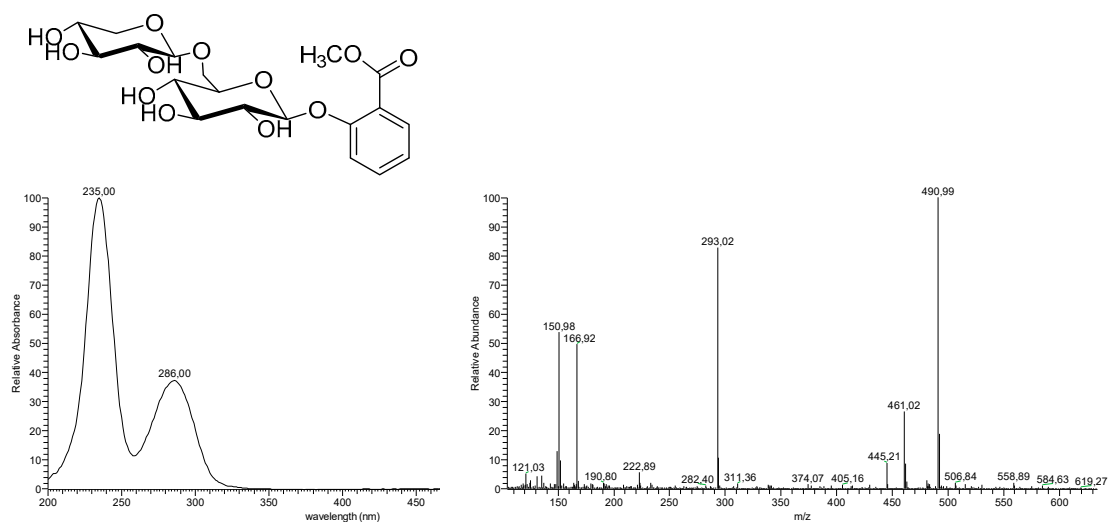

**Figure S2.** UV and MS spectra of the compound designated as gaultherin.

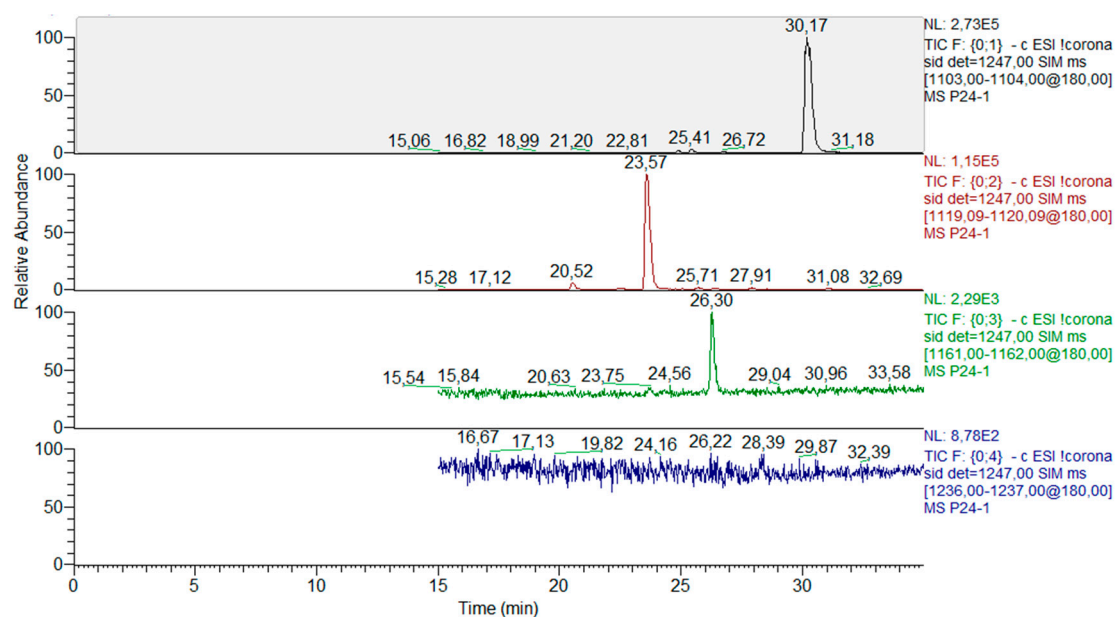

**Figure S3.** Representative HPLC-MS chromatogram (SIM mode) of the *Primula veris* subsp. *veris* root extracts from the wild-growing population of Mt. Pangaio. Conditions as in Figure S1. In black identification of primulasaponin I (**15**), in red priverosaponin B (**16**) and in green priverosaponin B 22-acetate (**17**).
